# Supplementary material for: Thermal physiology of Amazonian lizards (Reptilia: Squamata)
Source: PLoS One. 2018 Mar 7;13(3):e0192834. doi: 10.1371/journal.pone.0192834 (PMC5841663; doi:10.1371/journal.pone.0192834)
Supplement: S1 File — Tpref = preferred temperature; VTmin = Minimum voluntary temperature; VTmax = Maximum voluntary temperature; CTmin = Minimum critical temperature; CTmax = Maximum critical temperature. Available on doi: 10.6084/m9.figshare.5293756. (XLSX) [file pone.0192834.s001.xlsx]

## Sheet: Plan1
number	Species	Tpref	Vtmin	Vtmax	Ctmin	Ctmax	Local
CICRA106	Norops fuscoauratus	25.8163	25.7	25.865	NA	NA	Los Amigos
CICRA112	Norops chrysolepis	25.0608	24.315	25.095	NA	NA	Los Amigos
CICRA51	Norops ortonii	28.4899	26.905	30.46	NA	NA	Los Amigos
CICRA52	Cercosaura eigenmanni	25.6742	25.01	26.12	NA	NA	Los Amigos
CICRA53	Cercosaura eigenmanni	24.9621	24.86	24.94	NA	NA	Los Amigos
CICRA54	Cercosaura eigenmanni	25.1153	24.94	25.1	NA	NA	Los Amigos
CICRA55	Norops fuscoauratus	26.575	25.99	26.9	NA	NA	Los Amigos
CICRA56	Cercosaura argulus	25.8223	25.59	25.75	NA	NA	Los Amigos
CICRA58	Norops fuscoauratus	25.5442	25.395	25.97	NA	NA	Los Amigos
CICRA59	Norops fuscoauratus	25.756	25.54	25.665	NA	NA	Los Amigos
CICRA90	Norops chrysolepis	24.979	24.6825	25.18	NA	NA	Los Amigos
GRCOLLI 25839	Kentropyx calcarata	37.4228	35.1	39.75	12.2	43.2	Pium
GRCOLLI 25840	Kentropyx calcarata	38.1419	36.475	39.95	14.1	42.4	Pium
GRCOLLI 25841	Kentropyx calcarata	37.6121	36	39.625	13	43.1	Pium
GRCOLLI 25842	Kentropyx calcarata	35.6234	32.575	37.525	NA	NA	Pium
GRCOLLI 25843	Kentropyx calcarata	35.0556	34.625	36.975	12.6	44.4	Pium
GRCOLLI 25844	Kentropyx calcarata	36.9015	35.7	38.1	13.3	43	Pium
GRCOLLI 25845	Kentropyx calcarata	34.3289	32.6	35.7	13.2	43	Pium
GRCOLLI 25846	Kentropyx calcarata	36.6596	36.075	37.5	13	41.3	Pium
GRCOLLI 25849	Kentropyx calcarata	32.1818	30.3	32	14.3	44.1	Pium
GRCOLLI 25850	Kentropyx calcarata	37.6748	35.35	39	12.2	44	Pium
GRCOLLI 25851	Kentropyx calcarata	32.986	31.9	33.9	10.6	43.3	Pium
GRCOLLI 25852	Kentropyx calcarata	36.7824	35.8	37.5	NA	NA	Pium
GRCOLLI 25853	Kentropyx calcarata	35.3404	34.45	37.1	NA	NA	Pium
GRCOLLI 25855	Kentropyx calcarata	36.7449	35.5	38.3	NA	NA	Pium
GRCOLLI 25863	Kentropyx calcarata	37.8284	36.6	38.9	NA	NA	Pium
GRCOLLI 25864	Kentropyx calcarata	37.275	35.5	39.4	NA	NA	Pium
GRCOLLI 25867	Kentropyx calcarata	37.3162	35.475	38.925	NA	NA	Pium
GRCOLLI 25868	Kentropyx calcarata	37.1289	35.4	39.1	NA	NA	Pium
GRCOLLI 25869	Kentropyx calcarata	37.4838	37.2	38.3	NA	NA	Pium
GRCOLLI 25870	Kentropyx calcarata	34.9015	33.9	35.7	NA	NA	Pium
GRCOLLI 25871	Kentropyx calcarata	37.9957	37.6	39.1	NA	NA	Pium
GRCOLLI 25872	Kentropyx calcarata	32.9903	30.2	34.25	NA	NA	Pium
GRCOLLI 25873	Kentropyx calcarata	34.28	30	37.2	NA	NA	Pium
GRCOLLI 25874	Kentropyx calcarata	37.4705	35.55	39.475	NA	NA	Pium
GRCOLLI 25876	Kentropyx calcarata	37.55	35.5	39.425	NA	NA	Pium
GRCOLLI 25883	Kentropyx calcarata	36.7739	35.5	38.5	NA	NA	Pium
GRCOLLI 25884	Kentropyx calcarata	37.8106	36.7	38.4	NA	NA	Pium
GRCOLLI 25885	Kentropyx calcarata	36.0966	30.7	39	NA	NA	Pium
GRCOLLI 25886	Kentropyx calcarata	38.2906	37.8	39	NA	NA	Pium
GRCOLLI 25887	Kentropyx calcarata	34.5434	29.5	39.3	NA	NA	Pium
GRCOLLI 25888	Kentropyx calcarata	38.7761	37.3	40.2	NA	NA	Pium
GRCOLLI 25889	Kentropyx calcarata	36.5818	35.65	39	NA	NA	Pium
GRCOLLI 25890	Kentropyx calcarata	37.0216	37.1	38.8	NA	NA	Pium
GRCOLLI 25891	Kentropyx calcarata	32.1851	29.4	34.2	NA	NA	Pium
GRCOLLI 25892	Kentropyx calcarata	36.5755	35.9	37.55	NA	NA	Pium
GRCOLLI 25893	Kentropyx calcarata	39.8065	38.9	40.8	NA	NA	Pium
GRCOLLI 25894	Kentropyx calcarata	38.7606	38.4	39.9	NA	NA	Pium
GRCOLLI 25895	Kentropyx calcarata	37.4109	35.3	39.6	NA	NA	Pium
GRCOLLI 25898	Kentropyx calcarata	37.8554	37.6	39.8	NA	NA	Pium
GRCOLLI 25899	Kentropyx calcarata	38.9489	38.2	39.65	NA	NA	Pium
GRCOLLI 26033	Kentropyx calcarata	39.7718	38.65	40.4	NA	NA	Pium
GRCOLLI 26035	Kentropyx calcarata	37.6618	37.5	38.4	NA	NA	Pium
GRCOLLI 26036	Kentropyx calcarata	39.421	38.7	40.6	NA	NA	Pium
GRCOLLI 26068	Kentropyx calcarata	37.2777	37	37.9	NA	NA	Pium
GRCOLLI 26069	Kentropyx calcarata	37.8286	34.8	41.1	NA	NA	Pium
GRCOLLI 26070	Kentropyx calcarata	38.6779	37.3	40.8	NA	NA	Pium
GRCOLLI 26071	Kentropyx calcarata	38.1662	36.9	39.9	NA	NA	Pium
GRCOLLI 26072	Kentropyx calcarata	38.2327	37.5	39	NA	NA	Pium
GRCOLLI 26073	Kentropyx calcarata	37.3957	36.025	38.9	NA	NA	Pium
GRCOLLI 26074	Kentropyx calcarata	37.2489	37	38.1	NA	NA	Pium
GRCOLLI 26075	Kentropyx calcarata	39.4863	38.875	40.6	NA	NA	Pium
GRCOLLI 26075	Kentropyx calcarata	37.6641	36.7	38.7	NA	NA	Pium
GRCOLLI 26077	Kentropyx calcarata	39.4007	38.5	40	NA	NA	Pium
GRCOLLI 26078	Kentropyx calcarata	37.4971	37.225	38.475	NA	NA	Pium
GRCOLLI 26081	Kentropyx calcarata	32.5245	31.2	34	NA	NA	Pium
GRCOLLI 26082	Kentropyx calcarata	39.6579	38.9	40.2	NA	NA	Pium
GRCOLLI 26083	Kentropyx calcarata	38.0383	37	39.4	NA	NA	Pium
GRCOLLI 26084	Kentropyx calcarata	34.6809	34.6	34.8	NA	NA	Pium
GRCOLLI 26085	Kentropyx calcarata	27.5919	23	30.1	NA	NA	Pium
GRCOLLI 26086	Kentropyx calcarata	27.3417	22.9	29.675	NA	NA	Pium
LDV 01	Cnemidophorus cryptus	26.82	22.95	30.18	NA	NA	Caxiuana
LDV 02	Cnemidophorus cryptus	30.4073	29.45	31.32	NA	NA	Caxiuana
LDV 03	Chatogekko amazonicus	23.456	21.7	25.6	13.4	38.7	Caxiuana
LDV 04	Gonatodes humeralis	27.0643	26.575	28.8	9.7	45.1	Caxiuana
LDV 05	Arthrosaura kockii	28.4645	27.41	29.57	10.1	44	Caxiuana
LDV 06	Gonatodes humeralis	23.9692	23.7	24.2	12	NA	Caxiuana
LDV 07	Chatogekko amazonicus	23.116	21.4	23.9	NA	NA	Caxiuana
LDV 08	Chatogekko amazonicus	24	22.55	24.55	8.9	39.5	Caxiuana
LDV 09	Gonatodes humeralis	25.3571	23.75	26.625	13.9	44.2	Caxiuana
LDV 10	Gonatodes humeralis	24.3786	23.725	24.8	9.6	44.2	Caxiuana
LDV 100	Chatogekko amazonicus	24.2875	23	24.375	NA	NA	Caxiuana
LDV 101	Chatogekko amazonicus	22.4875	20.35	24.275	NA	NA	Caxiuana
LDV 102	Kentropyx calcarata	33.7875	33.55	35.65	14.2	39.1	Caxiuana
LDV 103	Chatogekko amazonicus	27.1667	24.225	29.425	NA	NA	Caxiuana
LDV 104	Cnemidophorus cryptus	29.0866	28.58	29.48	7.7	47.2	Caxiuana
LDV 105	Ameiva ameiva	31.5286	29.89	32.94	7.6	42.3	Caxiuana
LDV 106	Chatogekko amazonicus	24.6208	23.3	26.4	NA	NA	Caxiuana
LDV 107	Chatogekko amazonicus	26.1083	24.5	27.725	NA	NA	Caxiuana
LDV 108	Chatogekko amazonicus	24.8708	23.9	25.3	NA	NA	Caxiuana
LDV 109	Chatogekko amazonicus	24.6292	23.8	25.325	NA	NA	Caxiuana
LDV 11	Gonatodes humeralis	27.4217	26.05	29.1	13.3	44.1	Caxiuana
LDV 110	Chatogekko amazonicus	23.2625	21.875	24.6	NA	NA	Caxiuana
LDV 111	Chatogekko amazonicus	24.264	23.2	27.7	NA	NA	Caxiuana
LDV 112	Gonatodes humeralis	23.4227	45.525	23.875	NA	30.3	Caxiuana
LDV 113	Chatogekko amazonicus	23.488	23.1	23.6	NA	NA	Caxiuana
LDV 114	Arthrosaura kockii	29.5221	28.14	30.64	4.8	42.8	Caxiuana
LDV 115	Norops fuscoauratus	29.4137	28.32	29	7.1	35.2	Caxiuana
LDV 116	Gonatodes humeralis	23.85	23.225	23.9	23.9	NA	Caxiuana
LDV 117	Chatogekko amazonicus	23.996	22.9	24	NA	NA	Caxiuana
LDV 118	Chatogekko amazonicus	25.428	24.3	26.4	NA	NA	Caxiuana
LDV 119	Chatogekko amazonicus	22.98	19.4	27.9	NA	NA	Caxiuana
LDV 12	Gonatodes humeralis	27.4522	26.6	28.7	10.3	44.8	Caxiuana
LDV 120	Chatogekko amazonicus	23.9083	22.875	24.7	NA	NA	Caxiuana
LDV 121	Chatogekko amazonicus	25.06	23.9	25.7	NA	NA	Caxiuana
LDV 122	Arthrosaura kockii	25.4667	24.4	25.6	14.2	47	Caxiuana
LDV 123	Chatogekko amazonicus	20.876	19	22.4	NA	NA	Caxiuana
LDV 124	Kentropyx calcarata	30.7053	30.26	31.64	5.1	47.1	Caxiuana
LDV 125	Chatogekko amazonicus	23.824	22.6	25.6	NA	NA	Caxiuana
LDV 126	Gonatodes humeralis	23.29	22.975	23.4	NA	NA	Caxiuana
LDV 127	Gonatodes humeralis	27.764	26.6	29	NA	NA	Caxiuana
LDV 128	Gonatodes humeralis	25.288	24.5	26.3	NA	NA	Caxiuana
LDV 129	Cnemidophorus cryptus	28.1151	26.94	29	7.1	50.4	Caxiuana
LDV 13	Gonatodes humeralis	26.3261	24.7	27.5	5.4	NA	Caxiuana
LDV 130	Arthrosaura kockii	21.892	21.3	22.9	5.7	42.2	Caxiuana
LDV 131	Copeoglossum nigropunctatum	29.4681	28.95	30.29	6.7	43.4	Caxiuana
LDV 132	Norops fuscoauratus	29.6787	28.26	30.97	NA	NA	Caxiuana
LDV 133	Iphisa elegans	22.336	21.8	22.9	3.1	38.4	Caxiuana
LDV 134	Plica umbra	27.208	25.8	27.9	5.3	38.2	Caxiuana
LDV 135	Gonatodes humeralis	24.9333	21.45	28.525	NA	NA	Caxiuana
LDV 136	Ameiva ameiva	27.376	26.8	28.1	13.6	55.6	Caxiuana
LDV 137	Kentropyx calcarata	29.725	28.45	31.65	23	38.4	Caxiuana
LDV 138	Kentropyx calcarata	24.824	24.5	25.4	16.1	40.8	Caxiuana
LDV 139	Ameiva ameiva	25.188	24.9	25.5	15.3	55.6	Caxiuana
LDV 14	Chatogekko amazonicus	25.2696	23.1	27.05	NA	NA	Caxiuana
LDV 140	Ameiva ameiva	27.672	26.9	28.8	10.4	56.9	Caxiuana
LDV 141	Ameiva ameiva	23.412	23	23.8	14.3	62.8	Caxiuana
LDV 142	Arthrosaura kockii	30.0596	28.87	29.94	8.4	36.1	Caxiuana
LDV 143	Cnemidophorus cryptus	30.0144	29.44	30.69	10.8	57.6	Caxiuana
LDV 144	Cnemidophorus cryptus	30.2972	30.06	31.21	9.5	58.3	Caxiuana
LDV 145	Cnemidophorus cryptus	29.2124	27.1	31.02	7.9	46.2	Caxiuana
LDV 146	Cnemidophorus cryptus	30.343	29.91	30.75	9.4	56.1	Caxiuana
LDV 147	Cnemidophorus cryptus	30.7805	30.39	31.36	5.7	48.8	Caxiuana
LDV 148	Kentropyx calcarata	28.422	29.86	31.09	16.5	43.1	Caxiuana
LDV 149	Norops fuscoauratus	27.5344	27.37	27.55	4.1	34.2	Caxiuana
LDV 15	Gonatodes humeralis	25.5435	23.9	27.15	14.8	38	Caxiuana
LDV 150	Ameiva ameiva	28.2643	27.21	29.32	13.6	47.3	Caxiuana
LDV 151	Copeoglossum nigropunctatum	30.2703	29.48	31.23	6	42.9	Caxiuana
LDV 152	Arthrosaura kockii	28.544	26.85	27.77	8.5	39.9	Caxiuana
LDV 153	Ameiva ameiva	24.996	23.6	26.2	12.5	40.7	Caxiuana
LDV 154	Gonatodes humeralis	26.128	25.1	27.1	NA	NA	Caxiuana
LDV 155	Gonatodes humeralis	22.656	21.4	23	NA	NA	Caxiuana
LDV 156	Gonatodes humeralis	27.512	27.1	27.6	NA	NA	Caxiuana
LDV 157	Arthrosaura kockii	26.14	24.7	27.2	9.1	38	Caxiuana
LDV 158	Norops fuscoauratus	26.26	24.9	27.2	9.1	NA	Caxiuana
LDV 159	Gonatodes humeralis	27.528	26.9	27.9	NA	NA	Caxiuana
LDV 16	Kentropyx calcarata	31.8943	31.55	32.37	5.9	37.9	Caxiuana
LDV 160	Norops fuscoauratus	25.284	24.7	27.7	8.6	30.5	Caxiuana
LDV 161	Norops fuscoauratus	27.7958	27.25	28.4	7.6	34	Caxiuana
LDV 162	Ameiva ameiva	29.4059	27.05	31.34	10.6	46.6	Caxiuana
LDV 163	Ameiva ameiva	27.912	26.8	29	14.2	46.2	Caxiuana
LDV 164	Ameiva ameiva	31.3084	30.82	32.42	5.3	39.7	Caxiuana
LDV 165	Arthrosaura kockii	28.3617	27.96	28.64	NA	29.3	Caxiuana
LDV 166	Gonatodes humeralis	26.724	25.2	27.2	NA	NA	Caxiuana
LDV 167	Norops fuscoauratus	28.8043	27.74	29.93	NA	NA	Caxiuana
LDV 168	Chatogekko amazonicus	23.02	21.4	24	NA	NA	Caxiuana
LDV 169	Chatogekko amazonicus	25.612	23.4	26	NA	NA	Caxiuana
LDV 17	Gonatodes humeralis	25.6	23.45	27.3	13.5	30.1	Caxiuana
LDV 170	Gonatodes humeralis	23.504	22.1	24.9	NA	30.2	Caxiuana
LDV 171	Chatogekko amazonicus	23.232	22.9	24.1	NA	NA	Caxiuana
LDV 172	Norops fuscoauratus	30.5693	30	31.04	NA	31.8	Caxiuana
LDV 173	Norops fuscoauratus	27.3772	27.02	27.46	11	29.6	Caxiuana
LDV 174	Norops fuscoauratus	29.1436	28.42	29.17	NA	NA	Caxiuana
LDV 175	Cnemidophorus cryptus	21.356	20.3	21.8	9.5	33.8	Caxiuana
LDV 176	Cnemidophorus cryptus	24.364	23.9	24.8	5.9	32.7	Caxiuana
LDV 177	Gonatodes humeralis	26.956	26.3	27.2	NA	NA	Caxiuana
LDV 178	Ameiva ameiva	25.224	23.7	26.5	NA	NA	Caxiuana
LDV 179	Chatogekko amazonicus	19.384	17.6	21.4	NA	NA	Caxiuana
LDV 18	Gonatodes humeralis	23	22.575	23.325	5.4	36	Caxiuana
LDV 180	Chatogekko amazonicus	24.2083	22.175	25.2	NA	NA	Caxiuana
LDV 181	Arthrosaura kockii	23.82	22.9	24.4	18.1	32.8	Caxiuana
LDV 182	Norops fuscoauratus	23.48	22.9	24.6	NA	NA	Caxiuana
LDV 183	Copeoglossum nigropunctatum	26.596	25.8	27.4	13.5	42.2	Caxiuana
LDV 184	Gonatodes humeralis	21.22	20.8	21.8	NA	NA	Caxiuana
LDV 185	Chatogekko amazonicus	24.7	24.1	25	NA	NA	Caxiuana
LDV 186	Chatogekko amazonicus	24.7792	24	24.9	NA	NA	Caxiuana
LDV 187	Gonatodes humeralis	21.196	20.8	21.7	NA	NA	Caxiuana
LDV 188	Gonatodes humeralis	23.016	22.3	23.5	NA	NA	Caxiuana
LDV 189	Ameiva ameiva	22.75	21.775	23.7	NA	NA	Caxiuana
LDV 19	Gonatodes humeralis	22.5	22.25	23	14.4	37.2	Caxiuana
LDV 190	Arthrosaura reticulata	22.725	20.85	23.775	24.7	33.4	Caxiuana
LDV 191	Gonatodes humeralis	22.528	21.7	23.3	NA	NA	Caxiuana
LDV 192	Chatogekko amazonicus	23.58	22.8	24	NA	NA	Caxiuana
LDV 193	Chatogekko amazonicus	23.65	22.775	24.25	NA	NA	Caxiuana
LDV 194	Gonatodes humeralis	22.892	21.2	25	NA	NA	Caxiuana
LDV 195	Gonatodes humeralis	22.64	21.3	24	NA	NA	Caxiuana
LDV 196	Cnemidophorus cryptus	27.2862	26.89	27.54	NA	NA	Caxiuana
LDV 197	Cnemidophorus cryptus	27.2478	26.87	27.25	NA	NA	Caxiuana
LDV 198	Cnemidophorus cryptus	26.8129	25.83	27.51	NA	NA	Caxiuana
LDV 199	Cnemidophorus cryptus	28.1682	27.33	29.09	NA	NA	Caxiuana
LDV 20	Ameiva ameiva	31.5031	29.59	32.11	NA	NA	Caxiuana
LDV 200	Cnemidophorus cryptus	27.9363	27.46	28.02	NA	NA	Caxiuana
LDV 201	Cnemidophorus cryptus	28.2107	26.7	29.67	NA	NA	Caxiuana
LDV 202	Cnemidophorus cryptus	30.5171	29.68	31.615	NA	NA	Caxiuana
LDV 203	Cnemidophorus cryptus	27.3367	26.89	27.45	NA	NA	Caxiuana
LDV 204	Cnemidophorus cryptus	24.7775	22.77	25.855	NA	NA	Caxiuana
LDV 205	Gonatodes humeralis	22.032	21.3	22.7	NA	NA	Caxiuana
LDV 206	Arthrosaura reticulata	26.7147	26.68	26.75	20	35.1	Caxiuana
LDV 207	Ameiva ameiva	25.5875	24.225	27.5	NA	NA	Caxiuana
LDV 208	Copeoglossum nigropunctatum	29	27.3	29.6	6.3	33.9	Ducke
LDV 209	Norops fuscoauratus	25.7	24.7	26.1	6.8	40.4	Ducke
LDV 21	Cnemidophorus cryptus	30.7275	31.2	31.91	NA	NA	Caxiuana
LDV 210	Gonatodes humeralis	25.4	23.3	27.35	2.7	NA	Ducke
LDV 211	Arthrosaura reticulata	23.3	22.5	23.8	8.9	39.9	Ducke
LDV 212	Norops fuscoauratus	25.9	25.4	26.5	9	33.5	Ducke
LDV 213	Norops fuscoauratus	26.6	26.1	27.1	14.4	36.6	Ducke
LDV 214	Chatogekko amazonicus	20.4	19.3	21.4	7.1	31	Ducke
LDV 215	Tretioscincus agilis	28	27.1	29.4	NA	NA	Ducke
LDV 216	Norops fuscoauratus	26.7	26.4	27.1	6.8	44.6	Ducke
LDV 217	Ameiva ameiva	27.8	27	28.6	6.8	50	Ducke
LDV 218	Chatogekko amazonicus	21.9	21.3	23.1	3.3	35	Ducke
LDV 219	Chatogekko amazonicus	22.3	21.8	23	8.6	NA	Ducke
LDV 22	Arthrosaura kockii	29.4305	27.92	30.59	14.8	NA	Caxiuana
LDV 220	Chatogekko amazonicus	20.8	19.8	22.1	6.3	35.2	Ducke
LDV 221	Norops chrysolepis	26.7	26.4	27.2	4.6	31.3	Ducke
LDV 222	Chatogekko amazonicus	26	24.7	28.3	15.2	41.2	Ducke
LDV 223	Norops fuscoauratus	27	26.6	28.3	4.3	32.6	Ducke
LDV 224	Norops fuscoauratus	27.1	26.8	27.8	1.1	48.9	Ducke
LDV 225	Chatogekko amazonicus	22.65	20.9	25.2	NA	NA	Ducke
LDV 226	Kentropyx calcarata	31	30.6	31.5	NA	NA	Ducke
LDV 227	Gonatodes humeralis	30.6	26.9	31	7	41.9	Ducke
LDV 228	Chatogekko amazonicus	24.5	23.7	25	NA	NA	Ducke
LDV 229	Norops chrysolepis	31.6	30.8	32.2	6.5	47.4	Ducke
LDV 23	Ameiva ameiva	27.78	27.2	28.7	NA	NA	Caxiuana
LDV 230	Norops chrysolepis	28	27.3	28.7	9.4	42.9	Ducke
LDV 231	Gonatodes humeralis	29	27.1	30.1	8	30.2	Ducke
LDV 232	Hemidactylus mabouia	27.9	27.5	28.5	12.2	31.1	Ducke
LDV 233	Kentropyx calcarata	34	32.3	35.1	18	31.8	Ducke
LDV 234	Leposoma percarinatum	26.9	26.5	27.7	8	26.9	Ducke
LDV 235	Gonatodes humeralis	25.2	23.75	26.2	NA	NA	Ducke
LDV 236	Leposoma percarinatum	27.4	26.5	28.6	NA	NA	Ducke
LDV 237	Leposoma percarinatum	27.4	26.9	28.5	8	37.5	Ducke
LDV 238	Arthrosaura reticulata	26.7	26.3	27.6	6.7	33.1	Ducke
LDV 239	Ameiva ameiva	28.7	27.3	35.3	NA	NA	Ducke
LDV 24	Ameiva ameiva	28.864	27.8	29.7	9.4	44.9	Caxiuana
LDV 240	Ameiva ameiva	32.2	31.2	33.3	10.2	45.2	Ducke
LDV 241	Ameiva ameiva	22.6	22.2	23.2	11.4	42	Ducke
LDV 242	Norops chrysolepis	28.6	27.7	30	7.7	36.8	Ducke
LDV 243	Chatogekko amazonicus	21.4	21.1	22	2.9	45.3	Ducke
LDV 244	Chatogekko amazonicus	26.2	23	NA	11.1	NA	Ducke
LDV 245	Gonatodes humeralis	27.3	28.4	28.05	NA	NA	Ducke
LDV 246	Gonatodes humeralis	26.7	25	27.6	7.1	38	Ducke
LDV 247	Ameiva ameiva	31.8	30.7	32.7	6.2	44	Ducke
LDV 248	Gonatodes humeralis	21.5	20.1	22	1.8	44	Ducke
LDV 249	Norops chrysolepis	29.7	28.8	30.3	7.1	37.4	Ducke
LDV 25	Cnemidophorus cryptus	29.0494	28.94	29.86	NA	NA	Caxiuana
LDV 250	Kentropyx calcarata	29	28.2	29.5	14.4	44	Ducke
LDV 251	Chatogekko amazonicus	27.2	25.7	28.1	5.4	35.5	Ducke
LDV 252	Ameiva ameiva	25.7	24.6	30.6	8.6	44.7	Ducke
LDV 253	Chatogekko amazonicus	28.3	26.5	30.2	2.3	35	Ducke
LDV 254	Ameiva ameiva	24.8	24.3	25.3	12.6	42.9	Ducke
LDV 255	Chatogekko amazonicus	21.7	21.4	22.1	5.2	37	Ducke
LDV 256	Norops fuscoauratus	28.2	27.5	29	4.2	31.6	Ducke
LDV 257	Chatogekko amazonicus	21.8	21.4	22.3	9.3	35.1	Ducke
LDV 258	Chatogekko amazonicus	25.3	24	26.4	5.3	33.5	Ducke
LDV 259	Arthrosaura reticulata	27.1	24.9	27.7	5.7	30.4	Ducke
LDV 26	Cnemidophorus cryptus	28.7791	28.32	29.03	NA	NA	Caxiuana
LDV 260	Leposoma osvaldoi	24.2	22.2	24.9	2.3	NA	Ducke
LDV 261	Arthrosaura reticulata	27.1	25.5	28	5.3	30.5	Ducke
LDV 262	Gonatodes humeralis	29.2	27.4	30.4	3.1	34.7	Ducke
LDV 263	Ameiva ameiva	30.4	28.1	34.2	14.1	42.6	Ducke
LDV 264	Ameiva ameiva	23.4	22.3	25.6	14.2	47.8	Ducke
LDV 265	Gonatodes humeralis	22.3	21	22.8	15.3	37.4	Ducke
LDV 266	Gonatodes humeralis	26.5	25.1	31.7	11.2	36.9	Ducke
LDV 267	Gonatodes humeralis	20	17.7	21.1	12.5	35.8	Ducke
LDV 268	Leposoma osvaldoi	20.9	20.4	25.8	15.4	33.7	Ducke
LDV 269	Norops fuscoauratus	24	13.5	26.6	7.7	37.5	Ducke
LDV 27	Cnemidophorus cryptus	31.8563	31.79	32.66	NA	NA	Caxiuana
LDV 270	Gonatodes humeralis	23.6	22.7	26.5	12.6	35.4	Ducke
LDV 271	Norops fuscoauratus	24.1	22.7	25.6	NA	NA	Ducke
LDV 272	Leposoma osvaldoi	20.5	20	21.6	11.2	31.7	Ducke
LDV 273	Leposoma percarinatum	17.5	16.7	18.8	7.2	29.2	Ducke
LDV 274	Alopoglossus angulatus	20.3	17.4	22.7	9.7	41.2	Ducke
LDV 275	Chatogekko amazonicus	21.3	20.6	22.8	10.8	37.4	Ducke
LDV 276	Leposoma osvaldoi	21.2	20.3	22.3	8.7	29.5	Ducke
LDV 277	Norops chrysolepis	23.2	22.7	24.8	9.1	39.5	Ducke
LDV 278	Ameiva ameiva	18.8	17.4	20.2	7.9	43	Ducke
LDV 279	Plica plica	26.8	25.9	28.2	6.4	38.7	Ducke
LDV 28	Arthrosaura kockii	27.7656	27.63	27.93	5.9	37.8	Caxiuana
LDV 280	Chatogekko amazonicus	20.8	19.4	21.4	11	35.6	Ducke
LDV 281	Norops chrysolepis	23.1	22.2	25	8.6	43.3	Ducke
LDV 282	Ameiva ameiva	33.3	30.2	35.1	10.2	49.2	Ducke
LDV 283	Norops fuscoauratus	21.8	19.9	22.8	NA	NA	Ducke
LDV 284	Kentropyx calcarata	27	25.7	27.7	9.9	35.7	Ducke
LDV 285	Kentropyx calcarata	29.9	29.2	31	9.9	42.8	Ducke
LDV 286	Gonatodes humeralis	26.5	25.5	27.6	NA	NA	Ducke
LDV 287	Ameiva ameiva	18.5	17	20	12	42.5	Ducke
LDV 288	Norops fuscoauratus	24.2	24	25.5	NA	NA	Ducke
LDV 289	Arthrosaura reticulata	24.6	22.6	26.3	11.1	35.7	Ducke
LDV 29	Chatogekko amazonicus	25.2	22.2	28.4	8	37.5	Caxiuana
LDV 290	Arthrosaura reticulata	22.2	19.3	23.6	11.04	32.8	Ducke
LDV 291	Tretioscincus agilis	32.4	31.5	33.6	4.3	37.9	Ducke
LDV 292	Tretioscincus agilis	27.4	26.8	29.3	9	36.6	Ducke
LDV 293	Tretioscincus agilis	27.1	25.7	30.8	9.1	43	Ducke
LDV 294	Gonatodes humeralis	18.6	17.5	19.9	2.9	33.9	Ducke
LDV 295	Cercosaura ocellata	31.2	30.2	32.8	NA	NA	Ducke
LDV 296	Cercosaura ocellata	26.05	24.5	27.3	NA	NA	Ducke
LDV 297	Ameiva ameiva	31.5	30.5	33.4	4.8	NA	Ducke
LDV 298	Norops fuscoauratus	26	25.5	26.3	1.6	31.8	Ducke
LDV 299	Chatogekko amazonicus	21.3	20.6	22.6	NA	NA	Ducke
LDV 30	Gonatodes humeralis	28	26.075	29.55	9.9	37.2	Caxiuana
LDV 300	Gonatodes humeralis	27.9	26.8	28.9	NA	NA	Ducke
LDV 301	Gonatodes humeralis	23.9	21.8	25	NA	NA	Ducke
LDV 302	Norops fuscoauratus	29.4	28.1	32.1	4.4	32	Ducke
LDV 303	Arthrosaura reticulata	26.1	25.6	26.7	11.1	35	Ducke
LDV 304	Gonatodes humeralis	29.8	28.6	30.6	NA	NA	Ducke
LDV 305	Chatogekko amazonicus	23.5	18.3	25	NA	NA	Ducke
LDV 306	Chatogekko amazonicus	23.3	21.8	25.6	NA	NA	Ducke
LDV 307	Leposoma percarinatum	26.7	25.9	27.5	5.4	30.1	Ducke
LDV 308	Chatogekko amazonicus	24.2	20.4	24.8	NA	NA	Ducke
LDV 309	Arthrosaura reticulata	18.5	17	20.5	7.7	NA	Ducke
LDV 31	Gonatodes humeralis	25.1577	24.425	25.775	8.3	39.1	Caxiuana
LDV 310	Arthrosaura reticulata	24.1	23.8	27.2	2.6	32.7	Ducke
LDV 311	Ameiva ameiva	31.6	30.7	32.2	2.9	38.2	Ducke
LDV 312	Ameiva ameiva	35.7	33.1	36.9	10.7	49.1	Ducke
LDV 313	Ameiva ameiva	26.5	26	26.9	14.5	44.8	Ducke
LDV 314	Gonatodes humeralis	27.4	26.3	28.8	NA	NA	Ducke
LDV 315	Gonatodes humeralis	20	17.7	23.8	NA	NA	Ducke
LDV 316	Gonatodes humeralis	22.5	17.2	23.6	NA	NA	Ducke
LDV 317	Arthrosaura reticulata	26.3	25.6	27.3	13.3	31.6	Ducke
LDV 318	Norops fuscoauratus	26	28.9	30.5	NA	NA	Ducke
LDV 319	Chatogekko amazonicus	16.1	14.2	18.7	NA	NA	Ducke
LDV 32	Gonatodes humeralis	27.2038	26.75	27.675	11.5	NA	Caxiuana
LDV 320	Arthrosaura reticulata	26	24.8	26.7	5.5	30.9	Ducke
LDV 321	Norops fuscoauratus	27.9	26	29.8	NA	NA	Ducke
LDV 322	Gonatodes humeralis	24	22.1	30.5	NA	NA	Ducke
LDV 323	Gonatodes humeralis	31.7	30.5	32.8	NA	NA	Ducke
LDV 324	Gonatodes humeralis	24.8	24	26.4	NA	NA	Ducke
LDV 325	Norops fuscoauratus	32.7	24	26.4	NA	NA	Ducke
LDV 326	Thecadactylus rapicauda	28.1	26	30.8	NA	NA	Ducke
LDV 327	Gonatodes humeralis	27	25.525	29.025	NA	NA	Ducke
LDV 328	Leposoma percarinatum	29.3	28.5	31	2.1	35.4	Ducke
LDV 329	Chatogekko amazonicus	25.6	21.7	27.4	NA	NA	Ducke
LDV 33	Leposoma percarinatum	22.98	22.2	24.2	7.3	40.6	Caxiuana
LDV 330	Gonatodes humeralis	33.9	33.1	34.6	NA	NA	Ducke
LDV 331	Chatogekko amazonicus	26.55	22.8	29.7	NA	NA	Ducke
LDV 332	Norops fuscoauratus	26.65	26	27.7	NA	NA	Ducke
LDV 333	Gonatodes humeralis	26.9	25.8	27.6	NA	NA	Ducke
LDV 334	Norops fuscoauratus	29.8	28.7	31	NA	NA	Ducke
LDV 335	Norops fuscoauratus	26.9	23	29.9	NA	NA	Ducke
LDV 336	Gonatodes humeralis	31.3	29.4	33	NA	NA	Ducke
LDV 337	Gonatodes humeralis	28.1	24.6	31.1	NA	NA	Ducke
LDV 338	Gonatodes humeralis	24.2	23.4	26	NA	NA	Ducke
LDV 339	Gonatodes humeralis	20.6	19.9	21.9	NA	NA	Ducke
LDV 34	Gonatodes humeralis	23.7269	23.025	24.3	14.8	39.3	Caxiuana
LDV 340	Gonatodes humeralis	23.8	23.3	24.2	NA	NA	Ducke
LDV 341	Gonatodes humeralis	26.2	25.8	27.325	NA	NA	Ducke
LDV 342	Gonatodes humeralis	25.7	23.1	28.8	NA	NA	Ducke
LDV 343	Gonatodes humeralis	23.4	23.2	23.5	NA	NA	Ducke
LDV 344	Norops fuscoauratus	24.8	24.2	25.2	NA	NA	Ducke
LDV 345	Norops chrysolepis	32.2	31.4	33	9.7	48.3	Ducke
LDV 346	Gonatodes humeralis	20	19.4	20.7	NA	NA	Ducke
LDV 347	Gonatodes humeralis	24.7	23.6	25.3	NA	NA	Ducke
LDV 348	Norops fuscoauratus	26.4	25.8	26.9	NA	NA	Ducke
LDV 349	Chatogekko amazonicus	20.5	18.9	22.6	NA	NA	Ducke
LDV 35	Gonatodes humeralis	24.6923	24.4	24.975	10.5	33.5	Caxiuana
LDV 350	Arthrosaura reticulata	25.3	24.9	25.8	NA	NA	Ducke
LDV 351	Gonatodes humeralis	25.6	24.9	27.2	NA	NA	Ducke
LDV 352	Ameiva ameiva	36.1	35.3	37.4	14.2	53.3	Ducke
LDV 353	Ameiva ameiva	33.9	31.9	34.3	8.8	49.8	Ducke
LDV 354	Gonatodes humeralis	21.6	20.4	27.6	NA	NA	Ducke
LDV 355	Gonatodes humeralis	30.5	29.7	33.2	NA	NA	Ducke
LDV 356	Gonatodes humeralis	27.5	26.2	27.9	NA	NA	Ducke
LDV 357	Kentropyx calcarata	35.4	34.3	36.3	NA	NA	Ducke
LDV 358	Leposoma osvaldoi	20.5	18.8	22.9	NA	NA	Ducke
LDV 359	Norops fuscoauratus	28.2	28.1	30.2	NA	NA	Ducke
LDV 36	Gonatodes humeralis	25.036	23.8	26.3	12.4	41.9	Caxiuana
LDV 360	Gonatodes humeralis	20.9	17.6	22.5	NA	NA	Ducke
LDV 361	Norops fuscoauratus	28.2	27.8	28.5	NA	NA	Ducke
LDV 362	Gonatodes humeralis	29.3	26.3	31	NA	NA	Ducke
LDV 363	Gonatodes humeralis	26	25.3	26.5	NA	NA	Ducke
LDV 364	Gonatodes humeralis	18.6	15.1	23.3	NA	NA	Ducke
LDV 365	Gonatodes humeralis	24.8	24.1	25.6	NA	NA	Ducke
LDV 366	Gonatodes humeralis	22	20.2	23.5	NA	NA	Ducke
LDV 367	Gonatodes humeralis	28	27.2	28.9	NA	NA	Ducke
LDV 368	Tretioscincus agilis	33	31.7	34.4	9.9	39.3	Ducke
LDV 369	Norops fuscoauratus	26.7	26.5	26.9	NA	NA	Ducke
LDV 37	Gonatodes humeralis	27.888	24.5	30.4	15.4	39.3	Caxiuana
LDV 370	Kentropyx calcarata	32.5	31.5	33.4	10.6	49.2	Ducke
LDV 371	Norops ortonii	31.7	30.5	33.3	14	42.8	Ducke
LDV 372	Ameiva ameiva	37.4	35.6	38.6	NA	NA	Ducke
LDV 373	Arthrosaura reticulata	26.4	25.3	28.2	NA	NA	Ducke
LDV 374	Norops fuscoauratus	27.5	26.4	28.6	NA	NA	Ducke
LDV 375	Norops fuscoauratus	22.1	18.6	26	NA	NA	Ducke
LDV 376	Leposoma percarinatum	17.2	15.3	21.8	13	38.3	Ducke
LDV 377	Leposoma percarinatum	20.7	18	21.9	19.5	36.8	Ducke
LDV 378	Leposoma osvaldoi	25.7	24.9	26.8	14.6	41.4	Ducke
LDV 379	Arthrosaura reticulata	26.4	24.9	28	NA	NA	Ducke
LDV 38	Gonatodes humeralis	19.936	18.1	20.8	NA	NA	Caxiuana
LDV 380	Leposoma percarinatum	13.4	11.6	16.3	14.2	39.5	Ducke
LDV 381	Norops fuscoauratus	27.7	25.8	29.6	NA	NA	Ducke
LDV 382	Leposoma percarinatum	27.3	25.5	29	14.7	37.5	Ducke
LDV 383	Kentropyx calcarata	30.9	29.5	31.8	9.4	42.8	Ducke
LDV 384	Leposoma osvaldoi	26.3	24.9	27.2	12.6	36.1	Ducke
LDV 385	Norops chrysolepis	33	30.1	33.7	9.8	44.2	Ducke
LDV 386	Chatogekko amazonicus	16.3	15.7	20.6	NA	NA	Ducke
LDV 387	Ameiva ameiva	32.8	31.1	35	12.2	43.3	Ducke
LDV 388	Norops fuscoauratus	28.6	28	30.1	NA	NA	Ducke
LDV 389	Chatogekko amazonicus	22.6	19.9	23.4	NA	NA	Ducke
LDV 39	Ameiva ameiva	28.38	26.6	30.6	9.4	50.2	Caxiuana
LDV 390	Leposoma osvaldoi	25.5	24.3	26.8	NA	NA	Ducke
LDV 391	Kentropyx calcarata	23.3	20.2	24.2	9.4	NA	Ducke
LDV 392	Arthrosaura reticulata	27.7	27.5	28.7	NA	NA	Ducke
LDV 393	Norops fuscoauratus	33.1	26.7	33.6	NA	NA	Ducke
LDV 394	Ameiva ameiva	38.3	37.1	39.5	NA	NA	Ducke
LDV 395	Hemidactylus mabouia	26.7	26.1	27.3	16.8	38.4	Ducke
LDV 396	Hemidactylus mabouia	27.8	26.8	29.3	10.2	28.5	Ducke
LDV 397	Chatogekko amazonicus	25.3	23.3	26.5	NA	NA	Ducke
LDV 398	Alopoglossus angulatus	23.5	15.5	25.7	8.3	33.1	Ducke
LDV 399	Norops fuscoauratus	27.1	26.4	27.3	NA	NA	Ducke
LDV 40	Ameiva ameiva	30.14	29.8	31.2	11.3	45.7	Caxiuana
LDV 400	Ameiva ameiva	29.4	28.5	32	11.7	38.6	Ducke
LDV 401	Leposoma osvaldoi	32.4	31.3	33.6	9.4	37.1	Ducke
LDV 402	Chatogekko amazonicus	22.1	20.1	26.9	NA	NA	Ducke
LDV 403	Norops fuscoauratus	27.6	27.2	27.9	NA	NA	Ducke
LDV 404	Norops fuscoauratus	19.2	17.6	21.4	NA	NA	Ducke
LDV 405	Leposoma percarinatum	19.2	17.4	24.3	7	37.9	Ducke
LDV 406	Leposoma percarinatum	25.6	25	26.4	NA	NA	Ducke
LDV 407	Gonatodes humeralis	16.8	15.3	23.2	NA	NA	Ducke
LDV 408	Gonatodes humeralis	32	27.3	33.4	NA	NA	Ducke
LDV 409	Leposoma osvaldoi	24.6	23.4	25.5	14.3	41.5	Ducke
LDV 41	Ameiva ameiva	21.9125	21.5	22.325	14	40	Caxiuana
LDV 410	Gonatodes humeralis	24.5	22.4	26.9	NA	NA	Ducke
LDV 411	Norops fuscoauratus	29.8	28.9	30.6	NA	NA	Ducke
LDV 412	Arthrosaura reticulata	18.8	18.425	20.05	NA	NA	Ducke
LDV 413	Uranoscodon superciliosus	27	25.4	27.9	13.9	34.1	Ducke
LDV 414	Ameiva ameiva	35	33.3	35.6	8.7	45.2	Ducke
LDV 415	Ameiva ameiva	37.7	35.4	39.8	NA	NA	Ducke
LDV 416	Norops fuscoauratus	29.6	28.9	32	NA	NA	Ducke
LDV 417	Gonatodes humeralis	29.3	24.9	30.3	NA	NA	Ducke
LDV 418	Gonatodes humeralis	29.2	28.3	30.8	NA	NA	Ducke
LDV 419	Norops fuscoauratus	27.5	26.8	28.5	NA	NA	Ducke
LDV 42	Cnemidophorus cryptus	30.5333	29.85	30.54	NA	NA	Caxiuana
LDV 420	Hemidactylus mabouia	19.1	18.1	20	12.5	30.7	Ducke
LDV 421	Norops fuscoauratus	26.2	25.4	27.5	NA	NA	Ducke
LDV 422	Gonatodes humeralis	28.1	27.1	29.7	NA	NA	Ducke
LDV 423	Leposoma percarinatum	22.4	21.1	22.9	NA	NA	Ducke
LDV 424	Norops fuscoauratus	27.7	26.7	29.4	NA	NA	Ducke
LDV 425	Norops fuscoauratus	28.5	27.4	30.5	NA	NA	Ducke
LDV 426	Gonatodes humeralis	25.8	22.1	29.6	NA	NA	Ducke
LDV 427	Norops fuscoauratus	26.4	25.2	29.6	NA	NA	Ducke
LDV 428	Plica plica	28.9	27.5	30.3	13.8	38.5	Ducke
LDV 429	Plica umbra	27.8	26.8	28.9	10.1	44.4	Ducke
LDV 43	Cnemidophorus cryptus	29.6677	29.26	30.15	NA	NA	Caxiuana
LDV 430	Gonatodes humeralis	27.9	27.5	28.5	NA	NA	Ducke
LDV 431	Gonatodes humeralis	24.7	21.7	25.8	NA	NA	Ducke
LDV 432	Gonatodes humeralis	27.4	26.4	28.9	NA	NA	Ducke
LDV 433	Gonatodes humeralis	23.2	23	24.2	NA	NA	Ducke
LDV 434	Gonatodes humeralis	27.7	25.7	28.3	NA	NA	Ducke
LDV 435	Gonatodes humeralis	25.9	23.8	26.6	NA	NA	Ducke
LDV 436	Gonatodes humeralis	25.6	24.3	26.3	NA	NA	Ducke
LDV 437	Gonatodes humeralis	22.5	21.5	23.7	NA	NA	Ducke
LDV 438	Gonatodes humeralis	26.7	25.1	29.6	NA	NA	Ducke
LDV 439	Kentropyx calcarata	30.2	29.1	30.9	3.5	36.6	Ducke
LDV 44	Ameiva ameiva	26.9375	25.9	27.975	NA	NA	Caxiuana
LDV 440	Norops fuscoauratus	26.7	25.2	28.2	NA	NA	Ducke
LDV 441	Gonatodes humeralis	23.5	22.3	24.9	NA	NA	Ducke
LDV 442	Leposoma osvaldoi	25.3	24.3	26	0.5	40	Ducke
LDV 443	Gonatodes humeralis	28.2	27	28.8	NA	NA	Ducke
LDV 444	Norops fuscoauratus	27.7	26.9	28.8	NA	NA	Ducke
LDV 445	Gonatodes humeralis	23.8	18.2	25.2	NA	NA	Ducke
LDV 446	Chatogekko amazonicus	26.7	25.8	28.5	NA	NA	Ducke
LDV 447	Leposoma percarinatum	25.5	24.8	26	NA	NA	Ducke
LDV 448	Hemidactylus mabouia	29.5	28.1	30.4	6.3	33.5	Ducke
LDV 449	Norops chrysolepis	31.3	30.7	32.8	NA	NA	Ducke
LDV 45	Gonatodes humeralis	26.88	25.5	29	13.1	39.6	Caxiuana
LDV 450	Gonatodes humeralis	31.3	28	31.9	NA	NA	Ducke
LDV 451	Gonatodes humeralis	26.9	25.1	27.8	NA	NA	Ducke
LDV 452	Hemidactylus mabouia	29.5	28.3	30.3	8.7	39.6	Ducke
LDV 453	Ameiva ameiva	28.7	27.7	33	NA	NA	Ducke
LDV 454	Norops fuscoauratus	25.5	24.7	29.3	NA	NA	Ducke
LDV 455	Ameiva ameiva	23.5	23.3	24.8	NA	NA	Ducke
LDV 456	Gonatodes humeralis	28.7	27.6	29.2	NA	NA	Ducke
LDV 457	Gonatodes humeralis	25	24	25.7	NA	NA	Ducke
LDV 458	Kentropyx calcarata	29.5	26.8	32.3	10.5	41.3	Ducke
LDV 459	Gonatodes humeralis	23.5	22.9	24	NA	NA	Ducke
LDV 46	Chatogekko amazonicus	18.4667	13.1	23.4	13.1	35.2	Caxiuana
LDV 460	Norops chrysolepis	31	29.6	31.5	15.5	38.2	Ducke
LDV 461	Gonatodes humeralis	25.7	21.8	27.6	NA	NA	Ducke
LDV 462	Gonatodes humeralis	20.6	19.3	24.6	NA	NA	Ducke
LDV 463	Gonatodes humeralis	26.7	26	27.2	NA	NA	Ducke
LDV 464	Gonatodes humeralis	20.8	19.7	21.7	NA	NA	Ducke
LDV 465	Gonatodes humeralis	22.1	20.8	22.3	NA	NA	Ducke
LDV 466	Arthrosaura reticulata	23	22.3	23.2	NA	NA	Ducke
LDV 467	Arthrosaura reticulata	23.9	23.6	25.6	NA	NA	Ducke
LDV 468	Arthrosaura reticulata	15.4	14.2	17.6	NA	NA	Ducke
LDV 469	Arthrosaura reticulata	25.2	24	26	NA	NA	Ducke
LDV 47	Norops fuscoauratus	29.2274	28.88	29.42	10.5	32.4	Caxiuana
LDV 470	Gonatodes humeralis	28.1	27.3	28.6	NA	NA	Ducke
LDV 471	Gonatodes humeralis	25	24.1	26.3	NA	NA	Ducke
LDV 472	Gonatodes humeralis	26.4	25.8	27.5	NA	NA	Ducke
LDV 473	Gonatodes humeralis	24.4	24	25	NA	NA	Ducke
LDV 474	Ameiva ameiva	33.8	31.8	34.8	NA	NA	Ducke
LDV 475	Norops fuscoauratus	27.8	26.8	28.2	NA	NA	Ducke
LDV 476	Plica umbra	27.2	26.1	28	18.5	38.9	Ducke
LDV 477	Gonatodes humeralis	26	25.6	27	NA	NA	Ducke
LDV 478	Gonatodes humeralis	27.3	26.4	28.6	NA	NA	Ducke
LDV 479	Gonatodes humeralis	28.2	27.8	28.5	NA	NA	Ducke
LDV 48	Copeoglossum nigropunctatum	28.2327	27.82	28.88	18.3	40.5	Caxiuana
LDV 480	Gonatodes humeralis	29.5	28	30.1	NA	NA	Ducke
LDV 481	Ameiva ameiva	31.1	29.2	31.7	16.8	43.8	Ducke
LDV 482	Ameiva ameiva	24.4	24.2	24.9	NA	NA	Ducke
LDV 483	Gonatodes humeralis	22.7	21.3	26.1	NA	NA	Ducke
LDV 484	Norops fuscoauratus	26.8	26.2	27.5	NA	NA	Ducke
LDV 485	Norops fuscoauratus	26.8	26.1	27.8	NA	NA	Ducke
LDV 486	Gonatodes humeralis	26.6	26.1	27.2	NA	NA	Ducke
LDV 487	Gonatodes humeralis	27	24.6	28.3	1.4	39.1	Ducke
LDV 488	Norops fuscoauratus	27.6	26.7	29.5	NA	NA	Ducke
LDV 489	Gonatodes humeralis	27.65	24.3	28.8	NA	NA	Ducke
LDV 49	Gonatodes humeralis	25.5739	24.3	26.8	NA	35.6	Caxiuana
LDV 490	Chatogekko amazonicus	24.9	24.3	26.8	NA	NA	Ducke
LDV 491	Chatogekko amazonicus	18.9	16.7	20.1	NA	NA	Ducke
LDV 492	Gonatodes humeralis	25.1	24.1	28.8	NA	NA	Ducke
LDV 493	Gonatodes humeralis	24.8	24.5	26.6	8	41.5	Ducke
LDV 494	Norops fuscoauratus	28.1	27.5	28.9	NA	NA	Ducke
LDV 495	Gonatodes humeralis	28.3	27.9	29.1	NA	NA	Ducke
LDV 496	Gonatodes humeralis	29	28.8	29.6	3.4	36.9	Ducke
LDV 497	Norops fuscoauratus	28.5	27.5	29.2	9.1	36.4	Ducke
LDV 498	Leposoma percarinatum	22.6	21.2	23.2	NA	NA	Ducke
LDV 499	Chatogekko amazonicus	26.6	25.3	28	NA	NA	Ducke
LDV 50	Arthrosaura kockii	29.552	27.53	32.27	13.2	44.3	Caxiuana
LDV 500	Gonatodes humeralis	27.3	26.9	28.2	NA	NA	Ducke
LDV 501	Chatogekko amazonicus	20.9	19.7	21.8	NA	NA	Ducke
LDV 502	Gonatodes humeralis	26.9	26.6	27.875	NA	NA	Ducke
LDV 503	Arthrosaura reticulata	26	24.5	27.2	NA	NA	Ducke
LDV 504	Arthrosaura reticulata	24.3	23	25	NA	NA	Ducke
LDV 505	Norops fuscoauratus	25.9	25.4	27	9.6	39.7	Ducke
LDV 506	Norops fuscoauratus	28.7	28	30.3	3.1	37	Ducke
LDV 507	Gonatodes humeralis	24.9	23	26.8	5.3	35.8	Ducke
LDV 508	Gonatodes humeralis	25.4	21.4	29.2	6.2	37.8	Ducke
LDV 509	Gonatodes humeralis	29.5	28.3	31.2	10.1	38.6	Ducke
LDV 51	Gonatodes humeralis	27.4783	25	30.4	NA	NA	Caxiuana
LDV 510	Norops fuscoauratus	26.7	21.9	27.2	6.8	35.3	Ducke
LDV 511	Kentropyx calcarata	32.3	30	33.8	10.3	44.6	Ducke
LDV 512	Arthrosaura reticulata	21.8	19.8	24	NA	NA	Ducke
LDV 513	Chatogekko amazonicus	20.2	18.8	23.1	NA	NA	Ducke
LDV 514	Chatogekko amazonicus	21.1	17.6	27.9	NA	NA	Ducke
LDV 515	Thecadactylus rapicauda	21.8	21.2	22.7	3.6	40.9	Ducke
LDV 516	Arthrosaura reticulata	22	21	23.4	NA	NA	Ducke
LDV 517	Plica umbra	31.3	30.7	32.3	10.6	33.6	Ducke
LDV 518	Chatogekko amazonicus	20.6	19.6	22.4	NA	NA	Ducke
LDV 519	Hemidactylus mabouia	18.9	16.7	20.8	5.6	39.1	Ducke
LDV 52	Gonatodes humeralis	28.3625	25.4	30.35	5.4	32.5	Caxiuana
LDV 520	Plica umbra	30.8	28.8	31.6	11.4	40.7	Ducke
LDV 521	Norops chrysolepis	32.212	30.1	34.1	14.1	36.1	Amapa
LDV 522	Dactyloa punctata	24.516	18.1	31.4	6.1	37.5	Amapa
LDV 523	Hemidactylus mabouia	33.816	33.4	34.2	9.9	39.7	Amapa
LDV 524	Plica umbra	31.28	29.6	32.8	14.9	36.5	Amapa
LDV 525	Leposoma percarinatum	23.1	18.25	28.75	NA	NA	Amapa
LDV 526	Chatogekko amazonicus	30.324	27.8	33.1	NA	NA	Amapa
LDV 528	Norops chrysolepis	29.7	26	32.6	0.6	40.9	Amapa
LDV 529	Norops chrysolepis	27.82	26.8	28.8	15.1	37.8	Amapa
LDV 53	Ameiva ameiva	31.912	31.59	32.22	14.5	49.5	Caxiuana
LDV 530	Ameiva ameiva	31.268	18.25	28.75	8.7	45.2	Amapa
LDV 531	Kentropyx calcarata	29.1833	28.6	30.2	NA	NA	Amapa
LDV 532	Gonatodes humeralis	31.4625	31	31.95	NA	NA	Amapa
LDV 533	Leposoma percarinatum	24.56	18.9	31.8	13.1	NA	Amapa
LDV 534	Leposoma percarinatum	29.756	27.1	32.2	10.8	37.4	Amapa
LDV 535	Kentropyx calcarata	31.592	29.7	33.2	16.5	42.6	Amapa
LDV 536	Arthrosaura kockii	28.264	25.8	29.5	14.1	38.7	Amapa
LDV 537	Ameiva ameiva	32.14	31.1	33.1	6.8	46.1	Amapa
LDV 538	Ameiva ameiva	31.424	30.5	32.5	11.4	43.1	Amapa
LDV 539	Leposoma percarinatum	17.028	12.1	17.9	NA	NA	Amapa
LDV 54	Ameiva ameiva	30.0384	29.24	30.64	10.8	42.1	Caxiuana
LDV 540	Leposoma percarinatum	23.404	21.2	25.4	1	NA	Amapa
LDV 541	Copeoglossum nigropunctatum	32.308	30.9	33.5	14.9	40.3	Amapa
LDV 542	Norops chrysolepis	27.572	26.8	28.5	1.7	36.2	Amapa
LDV 543	Thecadactylus rapicauda	30.22	28.9	31.9	2.6	37.4	Amapa
LDV 544	Leposoma guianense	26.78	24	32.4	NA	NA	Amapa
LDV 545	Norops chrysolepis	33.3955	32.7	33.9	NA	NA	Amapa
LDV 546	Leposoma guianense	25.52	22.4	28.3	8.2	38.5	Amapa
LDV 547	Plica plica	33.032	31.8	34.2	NA	NA	Amapa
LDV 548	Plica plica	31.184	30.4	31.9	11.6	39.5	Amapa
LDV 549	Leposoma guianense	25.996	23.7	27.4	14.1	38	Amapa
LDV 55	Kentropyx calcarata	32.6292	30.175	35.875	17.7	43.4	Caxiuana
LDV 550	Ameiva ameiva	34.775	34.3	35.175	NA	NA	Amapa
LDV 551	Hemidactylus mabouia	33.4583	32.775	34.5	NA	NA	Amapa
LDV 552	Uranoscodon superciliosus	33.604	32.8	34.3	14.1	39	Amapa
LDV 553	Plica plica	31.052	29.5	33.1	18.4	37	Amapa
LDV 554	Plica plica	24.8	23.7	26.7	8.5	35.8	Amapa
LDV 555	Tretioscincus agilis	23.504	22.4	25.4	8.7	42.4	Amapa
LDV 556	Leposoma guianense	23.328	22.4	24.7	9.6	31.8	Amapa
LDV 557	Tretioscincus agilis	24.189	23.15	25.4	8.9	NA	Amapa
LDV 558	Plica plica	23.752	22.6	24.7	4.2	36.2	Amapa
LDV 559	Plica plica	22.128	19.8	25	NA	NA	Amapa
LDV 56	Gonatodes humeralis	24.316	23.5	24.4	NA	NA	Caxiuana
LDV 560	Ameiva ameiva	25.236	23.2	27.5	15.5	43.4	Amapa
LDV 561	Ameiva ameiva	26.04	23.6	28.1	11.9	NA	Amapa
LDV 562	Plica umbra	21.556	20.4	23.7	8.9	38.5	Amapa
LDV 563	Plica plica	24.576	23.2	26.3	NA	NA	Amapa
LDV 564	Plica umbra	26.38	25.2	28	NA	NA	Amapa
LDV 565	Plica plica	26.252	24.2	28.7	NA	NA	Amapa
LDV 566	Ameiva ameiva	25.76	23.5	28.5	10.7	40	Amapa
LDV 567	Kentropyx calcarata	24.516	23.8	24.9	NA	NA	Amapa
LDV 568	Chatogekko amazonicus	26.684	23.7	29.6	12.3	NA	Amapa
LDV 569	Leposoma percarinatum	20.94	18.8	23.8	NA	NA	Amapa
LDV 57	Ameiva ameiva	27.3411	22.99	30.72	6	44.1	Caxiuana
LDV 570	Leposoma guianense	22.776	20.8	24.3	NA	NA	Amapa
LDV 571	Copeoglossum nigropunctatum	27.036	23.8	30	9.5	34.4	Amapa
LDV 572	Arthrosaura kockii	25.112	23.7	26.7	13.3	NA	Amapa
LDV 573	Uranoscodon superciliosus	27.244	25.8	29.2	NA	NA	Amapa
LDV 574	Leposoma guianense	20.796	17.6	24.7	NA	NA	Amapa
LDV 575	Leposoma guianense	21.78	20.1	25.5	NA	NA	Amapa
LDV 576	Tretioscincus agilis	27.984	26.7	29.6	15.1	42.3	Amapa
LDV 577	Norops fuscoauratus	24.472	20.7	28.6	NA	NA	Amapa
LDV 578	Kentropyx calcarata	28.332	26.9	29.8	NA	NA	Amapa
LDV 579	Kentropyx calcarata	27.776	26.6	29.5	NA	NA	Amapa
LDV 58	Cnemidophorus cryptus	31.8718	30.58	32.89	NA	NA	Caxiuana
LDV 580	Kentropyx calcarata	27.912	26.9	29.4	NA	NA	Amapa
LDV 581	Leposoma guianense	23.764	23.1	24.8	NA	NA	Amapa
LDV 582	Tretioscincus agilis	26.4895	25.85	27.2	NA	NA	Amapa
LDV 583	Copeoglossum nigropunctatum	28.708	27.6	30.5	14.9	37	Amapa
LDV 584	Copeoglossum nigropunctatum	26.04	24.7	27.5	14.9	38.9	Amapa
LDV 585	Thecadactylus rapicauda	28.14	27	29.8	NA	NA	Amapa
LDV 586	Uranoscodon superciliosus	27.02	25.9	28.5	11.9	37.3	Amapa
LDV 587	Arthrosaura reticulata	26.66	26.1	27.5	4.3	39.1	Amapa
LDV 588	Kentropyx calcarata	30.216	28.5	31.5	5.8	NA	Amapa
LDV 589	Kentropyx calcarata	32.292	31.3	33	NA	NA	Amapa
LDV 59	Gonatodes humeralis	24.587	24.3	24.85	NA	NA	Caxiuana
LDV 590	Leposoma guianense	27.208	26.5	28.6	5.9	34.3	Amapa
LDV 591	Leposoma guianense	25.34	23.6	27.3	NA	NA	Amapa
LDV 592	Kentropyx calcarata	31.632	30	32.9	NA	NA	Amapa
LDV 593	Leposoma guianense	23.632	22.2	24.7	NA	NA	Amapa
LDV 594	Norops chrysolepis	27.224	26.9	28.1	7.8	43.4	Amapa
LDV 595	Kentropyx calcarata	31.468	30.2	32.6	8.9	40.3	Amapa
LDV 596	Gonatodes humeralis	28.228	27.2	29.4	13.5	NA	Amapa
LDV 597	Norops chrysolepis	29.184	27.7	30.3	16.5	39.4	Amapa
LDV 598	Norops chrysolepis	27.588	26.4	28.9	NA	NA	Amapa
LDV 599	Leposoma guianense	25.8692	22.2	27.2	2.5	NA	Amapa
LDV 60	Cnemidophorus cryptus	32.037	31.67	32.46	NA	NA	Caxiuana
LDV 600	Leposoma percarinatum	23.608	21.7	25.7	8.7	39.4	Amapa
LDV 601	Gonatodes humeralis	27.95	27	28.6	NA	NA	Amapa
LDV 602	Gonatodes humeralis	27.496	25.4	29.4	12	NA	Amapa
LDV 603	Uranoscodon superciliosus	27.748	26.4	29	11.9	40.1	Amapa
LDV 604	Uranoscodon superciliosus	28.78	27.2	30	4.5	46.7	Amapa
LDV 605	Leposoma percarinatum	27.72	26.8	28.7	NA	NA	Amapa
LDV 606	Leposoma percarinatum	24.26	21.3	27.2	7.9	41.4	Amapa
LDV 607	Norops fuscoauratus	22.98	22.1	23.9	NA	32.1	Amapa
LDV 608	Leposoma percarinatum	24.18	22.2	26	NA	NA	Amapa
LDV 609	Norops ortonii	26.85	25.9	27.175	NA	NA	Amapa
LDV 61	Ameiva ameiva	27.1083	26.6	27.6	NA	NA	Caxiuana
LDV 610	Kentropyx calcarata	28.2545	26.9	29.6	4.3	43.7	Amapa
LDV 611	Leposoma guianense	25.888	25.2	27.2	15.7	39.3	Amapa
LDV 612	Leposoma percarinatum	26.0172	24.5	28.2	8.7	38	Amapa
LDV 613	Kentropyx calcarata	28.024	26.7	29.3	NA	34.9	Amapa
LDV 614	Leposoma guianense	25.428	24.3	26.4	13.1	NA	Amapa
LDV 615	Plica plica	28.184	27	29.4	NA	NA	Amapa
LDV 616	Arthrosaura kockii	26.8385	26.5	29	NA	31.2	Amapa
LDV 617	Leposoma guianense	25.332	24.8	26.1	13	38.6	Amapa
LDV 618	Norops fuscoauratus	27.1	26.3	28.7	NA	NA	Amapa
LDV 619	Uranoscodon superciliosus	26.76	25.8	27.9	NA	39.9	Amapa
LDV 62	Cnemidophorus cryptus	29.3909	27.23	31.34	6.5	43.4	Caxiuana
LDV 620	Dactyloa punctata	27.356	25.3	29.3	9.8	41.7	Amapa
LDV 621	Plica umbra	28.576	27.3	28.6	NA	NA	Amapa
LDV 622	Plica umbra	24.408	23.2	25.4	6.1	40.2	Amapa
LDV 623	Plica umbra	29.352	28.1	30.8	7.8	40.1	Amapa
LDV 624	Arthrosaura reticulata	27.348	26.3	28.4	NA	NA	Amapa
LDV 625	Alopoglossus angulatus	27.496	26.7	28.5	NA	NA	Amapa
LDV 626	Iphisa elegans	28.38	27.5	29.2	NA	NA	Amapa
LDV 627	Kentropyx calcarata	29.172	28.1	30.3	NA	NA	Amapa
LDV 628	Tretioscincus agilis	28.14	27.4	29.1	NA	40.2	Amapa
LDV 629	Copeoglossum nigropunctatum	29.7455	27.7	31.1	NA	NA	Amapa
LDV 63	Norops fuscoauratus	30.5828	30.98	31.11	8.6	32.9	Caxiuana
LDV 630	Hemidactylus mabouia	27.0385	27.5	32.1	13.5	44.2	Amapa
LDV 631	Norops chrysolepis	28.932	27.6	30.2	9.1	33.7	Amapa
LDV 632	Leposoma percarinatum	31.9056	30.375	33.475	14.1	35.4	Amapa
LDV 633	Leposoma percarinatum	26.1778	23.3	29.3	NA	33.2	Amapa
LDV 634	Arthrosaura kockii	29.2	26.75	32.025	10.8	35.4	Amapa
LDV 635	Leposoma percarinatum	25.7833	23.2	28.275	NA	40.7	Amapa
LDV 636	Leposoma percarinatum	25.8167	22.825	28.6	NA	NA	Amapa
LDV 637	Leposoma guianense	28.5667	26	31.775	19.5	NA	Amapa
LDV 638	Leposoma guianense	27.7167	25.875	28.625	12.4	48.9	Amapa
LDV 639	Leposoma guianense	25.6111	24.325	27.575	9	NA	Amapa
LDV 64	Ameiva ameiva	26.5375	26.05	27.125	NA	NA	Caxiuana
LDV 640	Copeoglossum nigropunctatum	32.0909	30.95	33.15	NA	NA	Amapa
LDV 641	Plica plica	32.85	31.825	33.825	9.1	35.8	Amapa
LDV 642	Leposoma guianense	25.5278	24	26.75	NA	NA	Amapa
LDV 643	Kentropyx calcarata	33.8375	33.575	34	NA	NA	Amapa
LDV 644	Copeoglossum nigropunctatum	32.9625	32.1	33.5	NA	NA	Amapa
LDV 645	Leposoma guianense	26.2333	22.975	30.575	NA	38.8	Amapa
LDV 646	Gonatodes humeralis	32.0389	30.55	33.825	7.6	35.6	Amapa
LDV 647	Gonatodes humeralis	28.6611	27.25	30.175	NA	NA	Amapa
LDV 648	Norops fuscoauratus	31.7818	31.35	32.25	NA	NA	Amapa
LDV 649	Leposoma guianense	26.2167	24.5	28.275	9.9	35.9	Amapa
LDV 65	Chatogekko amazonicus	22.3957	21.05	24.4	3.4	36.7	Caxiuana
LDV 650	Thecadactylus rapicauda	33.8056	32.725	34.475	NA	NA	Amapa
LDV 651	Gonatodes anullaris	31.7833	31.025	32.45	16.5	NA	Amapa
LDV 652	Leposoma guianense	27.9444	26.55	29.175	NA	NA	Amapa
LDV 653	Norops chrysolepis	31.5389	31.225	32.05	10.9	37.9	Amapa
LDV 654	Kentropyx calcarata	33.15	31.825	34.125	NA	NA	Amapa
LDV 655	Norops ortonii	33.4882	32.8	34.2	NA	NA	Amapa
LDV 656	Norops ortonii	32.0294	32	34.1	NA	NA	Amapa
LDV 657	Thecadactylus rapicauda	30.9294	30	32.2	NA	36.9	Amapa
LDV 658	Leposoma guianense	27.2176	24.2	32.2	NA	NA	Amapa
LDV 659	Gonatodes humeralis	26.6529	25.7	27.5	NA	NA	Amapa
LDV 66	Chatogekko amazonicus	24.7913	23.25	27.4	3.8	33.1	Caxiuana
LDV 660	Norops fuscoauratus	28.3294	25	33	NA	NA	Amapa
LDV 661	Norops fuscoauratus	32.9	32.4	33.4	NA	NA	Amapa
LDV 662	Gonatodes humeralis	33.5786	32.85	34.4	10.8	34.8	Amapa
LDV 663	Gonatodes humeralis	33.7529	33.6	34.8	NA	NA	Amapa
LDV 664	Plica umbra	29.4235	28.2	31.9	NA	NA	Amapa
LDV 665	Ameiva ameiva	32.1294	NA	NA	NA	NA	Amapa
LDV 666	Kentropyx calcarata	32.7235	31.4	34.2	NA	NA	Amapa
LDV 668	Leposoma percarinatum	25.7882	23.4	26.9	NA	NA	Amapa
LDV 669	Gonatodes humeralis	30.9636	29.8	33.45	NA	NA	Amapa
LDV 67	Chatogekko amazonicus	20.29	17.25	20.9	1.8	35.4	Caxiuana
LDV 670	Leposoma guianense	27.0882	24.7	32.1	5.6	37.1	Amapa
LDV 671	Norops chrysolepis	31.9235	30.8	33.3	NA	NA	Amapa
LDV 672	Gonatodes humeralis	28.9923	26.3	31.3	NA	NA	Amapa
LDV 673	Leposoma guianense	25.3412	23.4	29.4	6.7	NA	Amapa
LDV 674	Gonatodes humeralis	27.7353	26.1	28.8	NA	33.7	Amapa
LDV 675	Norops ortonii	30.9706	30.1	31.8	12.5	NA	Amapa
LDV 676	Gonatodes humeralis	29.54	28.975	30.725	NA	NA	Amapa
LDV 677	Gonatodes humeralis	31.3176	30.7	32.1	NA	NA	Amapa
LDV 678	Norops ortonii	31.4083	30.55	32.125	NA	NA	Amapa
LDV 679	Plica umbra	31.2647	30.3	32.2	NA	NA	Amapa
LDV 68	Chatogekko amazonicus	26.5208	24.8	29.9	13	35.2	Caxiuana
LDV 680	Leposoma guianense	27.7941	24.5	31.4	10	29.3	Amapa
LDV 681	Kentropyx calcarata	31.4882	30.7	31.8	NA	NA	Amapa
LDV 682	Norops chrysolepis	31.1471	30.7	31.8	NA	NA	Amapa
LDV 683	Kentropyx calcarata	31.6706	30.9	32.7	NA	NA	Amapa
LDV 684	Dactyloa punctata	27.4824	23.9	30.7	NA	NA	Amapa
LDV 685	Dactyloa punctata	29.5941	27.8	31.3	NA	NA	Amapa
LDV 686	Norops chrysolepis	31.2529	30.2	32.2	14.2	39	Amapa
LDV 687	Leposoma percarinatum	16.42	13.4	15.1	NA	NA	Amapa
LDV 688	Norops fuscoauratus	27.8118	26.7	29.2	11.6	NA	Amapa
LDV 689	Norops fuscoauratus	19.7	15.6	22	17.5	NA	Amapa
LDV 69	Arthrosaura kockii	29.5307	28.9	29.76	6.1	40.9	Caxiuana
LDV 690	Gonatodes humeralis	25.6882	24	27.9	9.1	NA	Amapa
LDV 691	Norops fuscoauratus	27.0471	26.6	28.5	12.9	NA	Amapa
LDV 692	Gonatodes humeralis	26.7077	26	27.5	NA	NA	Amapa
LDV 693	Gonatodes humeralis	26.2	25.5	26.8	NA	NA	Amapa
LDV 694	Chatogekko amazonicus	24.644	22.8	26.5	NA	NA	Caxiuana
LDV 695	Chatogekko amazonicus	25.572	25.4	25.8	NA	NA	Caxiuana
LDV 696	Norops fuscoauratus	28.816	26.5	30.1	NA	NA	Caxiuana
LDV 697	Gonatodes humeralis	26.372	26.6	26.8	NA	NA	Caxiuana
LDV 698	Gonatodes humeralis	21.648	19.4	24.1	NA	NA	Caxiuana
LDV 699	Gonatodes humeralis	20.02	19	21.8	NA	NA	Caxiuana
LDV 70	Ameiva ameiva	33.3191	32.24	32.48	14.2	48.8	Caxiuana
LDV 700	Gonatodes humeralis	28.644	28.6	30.1	NA	NA	Caxiuana
LDV 701	Chatogekko amazonicus	24.48	23.5	25.6	NA	NA	Caxiuana
LDV 702	Chatogekko amazonicus	26.112	25.3	26.8	NA	NA	Caxiuana
LDV 703	Arthrosaura kockii	25.756	25.6	25.9	NA	NA	Caxiuana
LDV 704	Chatogekko amazonicus	23.516	22.9	23.9	NA	NA	Caxiuana
LDV 705	Chatogekko amazonicus	25.6	24.6	27.2	NA	NA	Caxiuana
LDV 706	Chatogekko amazonicus	26.256	25.2	28.4	NA	NA	Caxiuana
LDV 707	Chatogekko amazonicus	23.62	23.7	24.4	NA	NA	Caxiuana
LDV 708	Gonatodes humeralis	27.125	26.1	28.1	NA	NA	Caxiuana
LDV 709	Gonatodes humeralis	26.772	26.7	27.1	NA	NA	Caxiuana
LDV 71	Gonatodes humeralis	23.9208	21.9	24.675	13.4	37.7	Caxiuana
LDV 710	Gonatodes humeralis	29.764	29.6	30.2	NA	NA	Caxiuana
LDV 711	Gonatodes humeralis	26.048	25.9	26.1	NA	NA	Caxiuana
LDV 712	Chatogekko amazonicus	23.252	22.6	23.7	NA	NA	Caxiuana
LDV 713	Plica plica	25.956	25.7	26.2	NA	NA	Caxiuana
LDV 714	Arthrosaura kockii	27.8	27.1	28.3	NA	NA	Caxiuana
LDV 715	Gonatodes humeralis	28.136	27.5	29.3	NA	NA	Caxiuana
LDV 716	Gonatodes humeralis	27.908	27.8	28.4	NA	NA	Caxiuana
LDV 717	Gonatodes humeralis	27.212	27	27.4	NA	NA	Caxiuana
LDV 718	Gonatodes humeralis	27.352	27.5	27.8	NA	NA	Caxiuana
LDV 719	Arthrosaura kockii	28.032	27.9	28.7	NA	NA	Caxiuana
LDV 72	Gonatodes humeralis	25.2958	23.775	25.625	4.3	31.3	Caxiuana
LDV 720	Gonatodes humeralis	26.376	24.9	27.8	NA	NA	Caxiuana
LDV 721	Gonatodes humeralis	24.796	24.4	25.2	NA	NA	Caxiuana
LDV 722	Gonatodes humeralis	20.892	21.1	22.3	NA	NA	Caxiuana
LDV 723	Gonatodes humeralis	21.316	19.4	22.4	NA	NA	Caxiuana
LDV 724	Gonatodes humeralis	19.096	17.4	20.7	NA	NA	Caxiuana
LDV 725	Gonatodes humeralis	28.328	28.2	28.4	NA	NA	Caxiuana
LDV 726	Gonatodes humeralis	26.74	26.3	27.4	NA	NA	Caxiuana
LDV 727	Norops fuscoauratus	27.208	26.6	28.2	NA	NA	Caxiuana
LDV 728	Gonatodes humeralis	24.728	24.5	25	NA	NA	Caxiuana
LDV 729	Gonatodes humeralis	27.372	27.2	27.6	14.8	51.8	Caxiuana
LDV 73	Norops fuscoauratus	29.6779	29.7	30.3775	7.1	35	Caxiuana
LDV 730	Gonatodes humeralis	26.716	26.5	27.8	NA	NA	Caxiuana
LDV 731	Gonatodes humeralis	23.296	22.9	24.4	NA	NA	Caxiuana
LDV 732	Gonatodes humeralis	27.4	27.2	27.8	9.5	49.4	Caxiuana
LDV 733	Arthrosaura kockii	25.613	25.7	26.3	NA	NA	Caxiuana
LDV 734	Gonatodes humeralis	24.452	24.2	25.6	NA	NA	Caxiuana
LDV 735	Norops fuscoauratus	26.924	25.9	27.9	NA	NA	Caxiuana
LDV 736	Plica plica	24.724	24.6	24.9	8.6	50.8	Caxiuana
LDV 737	Gonatodes humeralis	28.668	28.4	28.9	11.3	50.2	Caxiuana
LDV 738	Gonatodes humeralis	30.04	28.3	31.5	4.7	NA	Caxiuana
LDV 739	Chatogekko amazonicus	23.1522	22	24.7	NA	NA	Caxiuana
LDV 74	Norops fuscoauratus	32.6381	32.29	33.03	12.1	34.5	Caxiuana
LDV 740	Chatogekko amazonicus	23.536	23	24.5	NA	NA	Caxiuana
LDV 741	Gonatodes humeralis	27.576	25.5	29.9	11.8	42.9	Caxiuana
LDV 742	Gonatodes humeralis	27.632	27.3	28	7.3	48.4	Caxiuana
LDV 743	Thecadactylus rapicauda	23.256	22.5	24.1	NA	NA	Caxiuana
LDV 744	Arthrosaura reticulata	24.744	23.7	25.9	NA	NA	Caxiuana
LDV 745	Norops fuscoauratus	25.872	25.7	26.1	NA	NA	Caxiuana
LDV 746	Chatogekko amazonicus	24.588	23.6	25.3	NA	NA	Caxiuana
LDV 747	Cnemidophorus cryptus	29.36	28.9	30.1	1	NA	Caxiuana
LDV 748	Cnemidophorus cryptus	26.908	26.4	27.8	7.8	44.4	Caxiuana
LDV 749	Cnemidophorus cryptus	19.3913	18.9	19.6	6.1	57.2	Caxiuana
LDV 75	Gonatodes humeralis	29.724	29.1	30.8	NA	NA	Caxiuana
LDV 750	Cnemidophorus cryptus	26.784	26.1	27.6	11.2	57.6	Caxiuana
LDV 751	Gonatodes humeralis	25.568	24	26.9	5.7	57.3	Caxiuana
LDV 752	Cnemidophorus cryptus	26.48	25.6	27	9.3	62.3	Caxiuana
LDV 753	Norops fuscoauratus	26.66	24.5	29.2	10.8	40.6	Caxiuana
LDV 754	Norops fuscoauratus	23.888	23.5	25.5	0.3	39.5	Caxiuana
LDV 755	Plica plica	18.524	17.5	20	9.2	39.6	Caxiuana
LDV 756	Norops fuscoauratus	25.78	24.3	27.7	NA	NA	Caxiuana
LDV 757	Chatogekko amazonicus	22.5	19.5	26.8	NA	NA	Caxiuana
LDV 758	Chatogekko amazonicus	23.736	22.3	24.7	NA	NA	Caxiuana
LDV 759	Cercosaura ocellata	27.828	27.5	28.8	NA	NA	Caxiuana
LDV 76	Gonatodes humeralis	32.836	24	25.4	NA	NA	Caxiuana
LDV 760	Gonatodes humeralis	26.384	23.9	29.6	4.9	50.9	Caxiuana
LDV 761	Chatogekko amazonicus	23.756	22.9	23.4	NA	NA	Caxiuana
LDV 762	Chatogekko amazonicus	22.3	21.2	23.2	NA	NA	Caxiuana
LDV 763	Arthrosaura kockii	19.984	18.7	20.3	NA	NA	Caxiuana
LDV 764	Gonatodes humeralis	27.152	27.3	27.5	5.5	47.3	Caxiuana
LDV 765	Gonatodes humeralis	26.976	27.6	28.4	5.1	45.5	Caxiuana
LDV 766	Gonatodes humeralis	23.46	22.9	24.9	3.8	47.9	Caxiuana
LDV 767	Norops fuscoauratus	27.66	27.4	27.9	14.8	37.8	Caxiuana
LDV 768	Gonatodes humeralis	26.212	24.9	27.4	10.4	50.2	Caxiuana
LDV 769	Gonatodes humeralis	28.116	27.9	29.1	5.7	47	Caxiuana
LDV 77	Ameiva ameiva	32.33	32.1	32.56	11.8	50	Caxiuana
LDV 770	Gonatodes humeralis	27.088	26.4	27.3	3.1	39.7	Caxiuana
LDV 771	Gonatodes humeralis	23.276	22.8	23.6	7.2	41.3	Caxiuana
LDV 772	Chatogekko amazonicus	24.3652	22.1	27.1	NA	NA	Caxiuana
LDV 773	Gonatodes humeralis	28.3292	27.5	29.4	6.4	46.8	Caxiuana
LDV 774	Gonatodes humeralis	26.04	25.8	28.2	6	45.3	Caxiuana
LDV 775	Chatogekko amazonicus	23.676	22.8	24.5	NA	NA	Caxiuana
LDV 776	Chatogekko amazonicus	23.816	20.5	27.4	NA	NA	Caxiuana
LDV 777	Gonatodes humeralis	27.192	27.7	28.5	6.6	39.4	Caxiuana
LDV 778	Chatogekko amazonicus	26.812	25.4	28.3	NA	NA	Caxiuana
LDV 779	Chatogekko amazonicus	26.844	27.5	28.3	NA	NA	Caxiuana
LDV 78	Leposoma percarinatum	25.2375	24.85	25.475	6.9	36.4	Caxiuana
LDV 780	Gonatodes humeralis	26.552	26.4	26.9	5	56.6	Caxiuana
LDV 781	Gonatodes humeralis	27.16	26.8	27.3	6.6	54	Caxiuana
LDV 782	Gonatodes humeralis	24.728	24.2	24.9	4.8	40.8	Caxiuana
LDV 783	Gonatodes humeralis	26.012	25.6	26.6	7.3	45.9	Caxiuana
LDV 784	Gonatodes humeralis	26.644	26.5	26.9	3.1	47.2	Caxiuana
LDV 785	Plica plica	18.348	17.7	18.9	3	42.4	Caxiuana
LDV 786	Norops fuscoauratus	28.588	28.2	28.9	11.4	52.3	Caxiuana
LDV 787	Chatogekko amazonicus	24.4609	23.8	25.1	8.6	45.1	Caxiuana
LDV 788	Arthrosaura kockii	22.424	19.7	24.2	9.8	54.9	Caxiuana
LDV 789	Chatogekko amazonicus	26.096	25	26.3	11	NA	Caxiuana
LDV 79	Chatogekko amazonicus	39.4857	23.1	29.8	14.4	36.6	Caxiuana
LDV 790	Leposoma percarinatum	19.448	15.5	23.1	6.4	41.7	Caxiuana
LDV 791	Chatogekko amazonicus	23.7739	22.3	23.3	12.8	41.9	Caxiuana
LDV 792	Chatogekko amazonicus	24.104	23.4	25.1	11.2	NA	Caxiuana
LDV 793	Chatogekko amazonicus	22.784	22	23.8	17.6	41.1	Caxiuana
LDV 794	Arthrosaura reticulata	26.996	26.8	27.8	5.9	43.8	Caxiuana
LDV 795	Norops fuscoauratus	27.025	26.6	27.5	13.1	54.1	Caxiuana
LDV 796	Chatogekko amazonicus	23.828	22.9	24	15.5	40.7	Caxiuana
LDV 797	Chatogekko amazonicus	24.492	22	27.4	11.3	42.1	Caxiuana
LDV 798	Arthrosaura kockii	22.752	17.8	29.1	NA	NA	Caxiuana
LDV 799	Arthrosaura kockii	28.464	26.6	30.9	13.6	51.4	Caxiuana
LDV 80	Chatogekko amazonicus	24.2167	21.975	29.55	14	33.7	Caxiuana
LDV 800	Arthrosaura kockii	25.276	24.6	25.9	NA	NA	Caxiuana
LDV 801	Chatogekko amazonicus	24.308	23	25.5	10.6	46.4	Caxiuana
LDV 802	Norops fuscoauratus	27.752	27.5	27.8	6.5	44.5	Caxiuana
LDV 803	Arthrosaura kockii	22.412	22.1	22.9	8.8	NA	Caxiuana
LDV 804	Chatogekko amazonicus	17.5	17	17.8	6.9	41.4	Caxiuana
LDV 805	Arthrosaura kockii	26.82	25.8	27.4	8.6	45.1	Caxiuana
LDV 806	Arthrosaura kockii	25.756	24.8	25.2	8.6	53	Caxiuana
LDV 807	Chatogekko amazonicus	23.492	21	25.8	16.5	45.2	Caxiuana
LDV 808	Arthrosaura kockii	25.252	25.2	25.4	7.6	49.8	Caxiuana
LDV 809	Arthrosaura kockii	24.304	22.4	24.8	6.1	48.7	Caxiuana
LDV 81	Chatogekko amazonicus	23.1167	21.225	25.15	NA	NA	Caxiuana
LDV 810	Chatogekko amazonicus	21.248	20.8	21.9	7.2	49.5	Caxiuana
LDV 811	Chatogekko amazonicus	22.46	19.4	26.3	9.9	44.1	Caxiuana
LDV 812	Arthrosaura kockii	24.5609	19	26.7	NA	NA	Caxiuana
LDV 813	Arthrosaura kockii	23.916	20	25.3	NA	NA	Caxiuana
LDV 814	Plica umbra	16.208	13.7	17.4	5.1	45.9	Caxiuana
LDV 815	Plica plica	21.7	21.1	22.3	7.7	36.9	Caxiuana
LDV 816	Norops fuscoauratus	23.092	17.3	27.8	4.8	45	Caxiuana
LDV 817	Arthrosaura reticulata	26.64	24.6	28.7	NA	NA	Caxiuana
LDV 818	Plica plica	22.8478	22.6	23.1	11.3	51.1	Caxiuana
LDV 819	Arthrosaura reticulata	20.64	19.6	21.8	4.9	50	Caxiuana
LDV 82	Leposoma percarinatum	26.0417	24.9	27.3	8.7	36.6	Caxiuana
LDV 820	Arthrosaura reticulata	26.736	26.3	27.2	4.2	NA	Caxiuana
LDV 821	Cnemidophorus cryptus	24.192	23.1	24.1	11.2	55.9	Caxiuana
LDV 822	Cnemidophorus cryptus	27.12	26	28.3	12.9	49	Caxiuana
LDV 823	Cnemidophorus cryptus	14.532	13.7	15.6	6.3	50.2	Caxiuana
LDV 824	Cnemidophorus cryptus	28.284	27.2	29.7	13.5	50.7	Caxiuana
LDV 825	Cnemidophorus cryptus	25.212	23.6	27	9.7	53.2	Caxiuana
LDV 826	Cnemidophorus cryptus	22.784	21.7	22.8	6.4	47.1	Caxiuana
LDV 827	Norops fuscoauratus	23.656	22.8	23.5	NA	NA	Caxiuana
LDV 828	Norops fuscoauratus	23.7	23.3	24.1	3.9	50	Caxiuana
LDV 829	Arthrosaura kockii	28.32	27.6	29.3	NA	NA	Caxiuana
LDV 83	Chatogekko amazonicus	23.5	21.6	25.2	NA	NA	Caxiuana
LDV 830	Leposoma percarinatum	27.6261	27.3	28.2	6.1	40.5	Caxiuana
LDV 831	Leposoma percarinatum	28.216	27.1	29.6	10	39	Caxiuana
LDV 832	Leposoma percarinatum	26.164	25.8	26.5	3.1	47.1	Caxiuana
LDV 833	Leposoma percarinatum	22.928	16.8	28.5	10.8	42.4	Caxiuana
LDV 834	Leposoma percarinatum	16.24	14.6	17.4	12.9	39	Caxiuana
LDV 835	Norops fuscoauratus	28.452	28.4	29.1	4.1	40.5	Caxiuana
LDV 836	Leposoma percarinatum	26.164	25.8	26.5	10.3	38.4	Caxiuana
LDV 837	Arthrosaura reticulata	20.316	19.6	22.3	1.1	NA	Caxiuana
LDV 838	Arthrosaura reticulata	26.508	26.1	27.9	NA	NA	Caxiuana
LDV 839	Leposoma percarinatum	27.104	26.8	28.1	NA	NA	Caxiuana
LDV 84	Gonatodes humeralis	24.7609	23.4	24.95	NA	NA	Caxiuana
LDV 840	Arthrosaura kockii	29.8667	29.3	30.4	NA	NA	Caxiuana
LDV 841	Arthrosaura kockii	28.112	26.6	28.6	8.9	54.8	Caxiuana
LDV 842	Leposoma percarinatum	15.716	11.5	17.3	3.1	37.9	Caxiuana
LDV 843	Copeoglossum nigropunctatum	30.86	30.5	31.8	9.6	47.6	Caxiuana
LDV 844	Norops fuscoauratus	26.0913	25.5	26.7	3.9	39.6	Caxiuana
LDV 845	Plica plica	27.544	27.1	28.2	2.7	47.8	Caxiuana
LDV 846	Norops fuscoauratus	26.8	25.7	27.3	3.6	49.5	Caxiuana
LDV 847	Norops ortonii	26.24	24.3	27.5	2.1	40.1	Caxiuana
LDV 848	Norops fuscoauratus	22.7167	20.9	24.8	12.1	NA	Caxiuana
LDV 849	Plica plica	27.256	26.7	28.2	10.8	37.4	Caxiuana
LDV 85	Norops fuscoauratus	32.5848	31.12	32.67	13.1	35.9	Caxiuana
LDV 850	Norops ortonii	25.856	24.5	26.4	NA	NA	Caxiuana
LDV 851	Norops fuscoauratus	25.328	24.4	26.3	6.6	44.3	Caxiuana
LDV 852	Norops fuscoauratus	28.172	27.7	28.8	NA	47.6	Caxiuana
LDV 853	Arthrosaura kockii	28.464	28.2	29.6	8.6	41.7	Caxiuana
LDV 854	Arthrosaura kockii	23.712	22.8	24.5	10.2	48.2	Caxiuana
LDV 855	Norops fuscoauratus	27.684	27	28.9	6.8	42.1	Caxiuana
LDV 856	Copeoglossum nigropunctatum	27.076	26.9	27.8	11.6	50.3	Caxiuana
LDV 857	Copeoglossum nigropunctatum	28.032	26.9	29.2	8.8	48.7	Caxiuana
LDV 858	Copeoglossum nigropunctatum	29.012	28.1	30.2	4.9	45.4	Caxiuana
LDV 859	Arthrosaura reticulata	26.152	25.1	26.9	8.4	43.5	Caxiuana
LDV 86	Chatogekko amazonicus	22.008	19.2	24.8	NA	NA	Caxiuana
LDV 860	Arthrosaura kockii	25.808	24.4	25.3	8.4	51.1	Caxiuana
LDV 861	Arthrosaura kockii	25.916	25.1	25.8	NA	NA	Caxiuana
LDV 862	Leposoma percarinatum	22.5652	22.8	23.5	8.9	NA	Caxiuana
LDV 863	Leposoma percarinatum	28.232	27.8	29.4	NA	NA	Caxiuana
LDV 864	Leposoma percarinatum	26.58	25.7	27.3	13.3	52.5	Caxiuana
LDV 865	Norops fuscoauratus	21.896	14.5	29.2	13	52.4	Caxiuana
LDV 866	Norops fuscoauratus	23.48	22.6	24.9	13.7	47.2	Caxiuana
LDV 867	Norops fuscoauratus	24.772	23.3	27.7	NA	NA	Caxiuana
LDV 868	Norops fuscoauratus	26.988	26.3	27.6	13.3	42.3	Caxiuana
LDV 869	Norops fuscoauratus	26.9042	26.1	27.7	NA	NA	Caxiuana
LDV 87	Arthrosaura kockii	30.28	30.27	30.33	16.1	43	Caxiuana
LDV 870	Copeoglossum nigropunctatum	29.768	29.4	30.1	6.3	49.5	Caxiuana
LDV 871	Copeoglossum nigropunctatum	31.176	30.9	32.1	10.2	50.9	Caxiuana
LDV 872	Norops ortonii	25.2783	25.1	25.5	NA	NA	Caxiuana
LDV 873	Copeoglossum nigropunctatum	28.34	24	31.3	9.8	49.6	Caxiuana
LDV 874	Copeoglossum nigropunctatum	29.9	29.4	31.4	NA	NA	Caxiuana
LDV 875	Leposoma percarinatum	27.2778	27	27.1	NA	NA	Caxiuana
LDV 876	Leposoma percarinatum	26.396	25.9	26.8	NA	54.4	Caxiuana
LDV 877	Norops fuscoauratus	26.6913	25.2	28	17	50.4	Caxiuana
LDV 878	Copeoglossum nigropunctatum	30.7261	30	32	12.9	50.9	Caxiuana
LDV 879	Norops ortonii	25.756	24.4	29.3	10.3	43.9	Caxiuana
LDV 88	Chatogekko amazonicus	25.684	23.2	27.6	NA	NA	Caxiuana
LDV 880	Arthrosaura reticulata	20.87	19.5	22.7	NA	NA	Caxiuana
LDV 881	Arthrosaura reticulata	26.4875	26.8	27.45	NA	NA	Caxiuana
LDV 882	Arthrosaura reticulata	25.3333	24.95	25.475	NA	NA	Caxiuana
LDV 883	Norops fuscoauratus	28	26.9	29.4	9.3	50	Caxiuana
LDV 884	Copeoglossum nigropunctatum	30.576	30.2	31.6	5.4	45.4	Caxiuana
LDV 885	Copeoglossum nigropunctatum	22.216	21.3	22.4	13.2	50.7	Caxiuana
LDV 886	Norops fuscoauratus	27.884	27.2	28.5	6.5	43.4	Caxiuana
LDV 887	Plica plica	29.4391	28.4	31.4	15.4	48.6	Caxiuana
LDV 888	Plica plica	24.26	23.8	24.6	12.5	39.4	Caxiuana
LDV 889	Plica plica	28.628	28.1	29.4	5.5	50.7	Caxiuana
LDV 89	Chatogekko amazonicus	27.788	23.3	32.3	NA	NA	Caxiuana
LDV 90	Gonatodes humeralis	26.26	24.3	28.2	NA	NA	Caxiuana
LDV 91	Ameiva ameiva	29.84	29.81	29.87	NA	NA	Caxiuana
LDV 92	Ameiva ameiva	34.9208	29.085	29.37	12.3	49.5	Caxiuana
LDV 93	Ameiva ameiva	33.4458	31.875	35.975	NA	NA	Caxiuana
LDV 94	Gonatodes humeralis	25.0318	23.625	25.35	NA	NA	Caxiuana
LDV 95	Chatogekko amazonicus	25.908	23.1	29.9	NA	NA	Caxiuana
LDV 96	Chatogekko amazonicus	23.36	22.3	25.2	NA	NA	Caxiuana
LDV 97	Arthrosaura kockii	28.199	28	29.5	11.6	44.9	Caxiuana
LDV 98	Chatogekko amazonicus	26.012	24	28.7	NA	NA	Caxiuana
LDV 99	Arthrosaura kockii	24.7875	24.2	25	8.1	48.2	Caxiuana
MR34	Ameiva ameiva	30.1357	29.3475	30.925	NA	NA	Los Amigos
YAS1	Plica umbra	24.707	24.35	25.0325	NA	NA	Yasuni
YAS11	Norops fuscoauratus	24.9372	24.18	25.49	NA	NA	Yasuni
YAS12	Norops fuscoauratus	24.532	24.3975	24.545	NA	NA	Yasuni
YAS14	Norops fuscoauratus	22.198	21.92	22.41	NA	NA	Yasuni
YAS19	Norops ortonii	24.5267	24.45	24.605	NA	NA	Yasuni
YAS2	Dactyloa transversalis	24.1505	23.99	24.29	NA	NA	Yasuni
YAS36	Norops fuscoauratus	24.9136	24.17	25.3625	NA	NA	Yasuni
YAS5	Norops fuscoauratus	23.4873	23.1225	23.78	NA	NA	Yasuni
YAS6	Norops ortonii	23.3688	22.55	24.255	NA	NA	Yasuni
YAS8	Norops ortonii	22.9382	22.56	23.2075	NA	NA	Yasuni
